# Supplementary material
Source: publisher figshare collection journal article supplement (https://f1000.figshare.com/articles/dataset/_/1383080)
Supplement: Supplementary file 1 [file 1]

## Sheet: Biological processes
GO-ID	p-value	corr p-value	x	n	X	N	Description	Genes in test set
6986	4.1201e-12	4.548e-09	13	66	195	14294	response to unfolded protein	EDEM3|HSP90AB1|HSPA5|EDEM1|HSPA4L|DERL1|HERPUD1|ERO1L|CREB3|DNAJB1|VAPB|DDIT3|DNAJC4
51789	4.6742e-12	4.548e-09	16	117	195	14294	response to protein stimulus	EDEM3|HSP90AB1|HSPA5|EDEM1|HSPA4L|DERL1|RNF5|HERPUD1|ERO1L|CCNA1|CREB3|DNAJB1|VAPB|DDIT3|DNAJC4|STUB1
44267	1.2448e-11	8.0746e-09	67	2151	195	14294	cellular protein metabolic process	FKBP10|HSP90AB1|GPAA1|PIGP|PIK3CB|ZDHHC1|ERO1L|UBL5|COL4A3BP|EEF2K|NEK2|SEC61B|PIM2|WHSC1L1|TRIM23|EIF2A|CCT2|USP8|EIF5B|ALG9|ALG5|OXSR1|SIRT1|RBX1|GAK|TBL1XR1|DAD1|TCP1|DNAJC4|PSME2|MPPE1|TLR4|PRKAA1|TSG101|PRKAA2|RPN2|HDAC1|HSPA4L|DERL1|STK39|RRBP1|RNF5|USP19|PRDX2|VCPIP1|DNAJB1|PCBP2|EP400|DNAJB9|MAPK1|CSK|EDEM3|RANBP2|EIF2B4|USP25|UBE2I|HSPA5|EDEM1|EEF2|DNAJC18|SNRK|SPCS1|COPS5|PPT1|STUB1|P4H…
71445	5.1574e-11	2.5091e-08	9	27	195	14294	cellular response to protein stimulus	CCNA1|HSPA5|VAPB|DDIT3|DERL1|STUB1|RNF5|HERPUD1|ERO1L
9987	1.4841e-10	5.3768e-08	167	9361	195	14294	cellular process	IRS1|SLC35B1|EHMT2|PARK7|FNBP1L|ZDHHC1|ERO1L|COL4A3BP|BCAP29|NEK2|PIM2|SLC39A7|SLC12A6|WHSC1L1|TRIM23|EIF2A|TSPYL2|PDIA3|USP8|ALG9|ALG5|GTF3A|TSC2|SDHD|RBX1|RRAGA|RRAGC|SLC9A6|TBL1XR1|DDIT3|SCG5|PSME2|HPRT1|CYP2E1|MPPE1|ARL8B|RTN3|RAB5B|TSG101|RTN1|RPN2|INSIG2|HSPA4L|STK39|ARL1|VPS26A|RTN4|SNX3|PRDX3|PRDX2|VCPIP1|LDHA|SNX2|BCL2L11|PCBP1|PRDX1|PCBP2|EP400|SNX7|MCL1|EDEM3|EIF2B4|UBE2I|CHKA|GOT1|HSP…
19538	1.6578e-10	5.3768e-08	73	2609	195	14294	protein metabolic process	FKBP10|HSP90AB1|GPAA1|PIGP|PIK3CB|ZDHHC1|ERO1L|UBL5|COL4A3BP|EEF2K|CAPNS1|FBXO3|NEK2|SEC61B|PIM2|WHSC1L1|TRIM23|EIF2A|CCT2|USP8|EIF5B|ALG9|ALG5|OXSR1|SIRT1|RBX1|GAK|TBL1XR1|DAD1|TCP1|DNAJC4|SCG5|PSME2|MPPE1|TLR4|PRKAA1|TSG101|PRKAA2|RPN2|HDAC1|HSPA4L|DERL1|STK39|RRBP1|RNF5|USP19|DPP3|PRDX2|VCPIP1|DNAJB1|PCBP2|EP400|DNAJB9|MAPK1|CSK|EDEM3|RANBP2|EIF2B4|MBTPS1|USP25|UBE2I|HSPA5|EDEM1|EEF2|DNAJC18|S…
15031	6.3226e-10	1.7577e-07	34	755	195	14294	protein transport	ARF4|RAB5B|TSG101|STX16|GOSR2|DERL1|SNX10|RRBP1|SNX30|SNX3|SEC61A2|RAB21|SNX2|VPS53|BCAP29|MAPK1|SEC61B|SNX7|RANBP2|PDIA3|SEC24A|COG6|GOT1|TSC2|ARFGAP3|ARL4D|GORASP1|VPS41|PPT1|SCG5|SEC24D|RAB5A|VPS28|ARF5
71216	9.1744e-10	1.8133e-07	10	49	195	14294	cellular response to biotic stimulus	HSPA5|VAPB|DDIT3|DERL1|MAPK1|STUB1|TLR4|RNF5|HERPUD1|ERO1L
45184	9.2114e-10	1.8133e-07	34	766	195	14294	establishment of protein localization	ARF4|RAB5B|TSG101|STX16|GOSR2|DERL1|SNX10|RRBP1|SNX30|SNX3|SEC61A2|RAB21|SNX2|VPS53|BCAP29|MAPK1|SEC61B|SNX7|RANBP2|PDIA3|SEC24A|COG6|GOT1|TSC2|ARFGAP3|ARL4D|GORASP1|VPS41|PPT1|SCG5|SEC24D|RAB5A|VPS28|ARF5
6984	9.318e-10	1.8133e-07	9	36	195	14294	ER-nucleus signaling pathway	HSPA5|INSIG2|VAPB|DDIT3|DERL1|ATP2A2|EIF2A|HERPUD1|ERO1L
6810	1.7934e-09	3.1726e-07	70	2575	195	14294	transport	ARF4|SLC35B1|ATP2A2|SNX10|PARK7|FNBP1L|ERO1L|SEC61A2|COL4A3BP|OSBP|BCAP29|TMED1|SEC61B|SLC39A7|SLC12A6|TMED5|PDIA3|COG6|SLC2A10|TSC2|SDHD|ARFGAP3|DNM1|DNM3|ARL4D|SLC9A6|DNAJC6|GORASP1|SCG5|MPPE1|VPS28|ARF5|RTN3|RAB5B|TSG101|STX16|GOSR2|DERL1|ARL1|VPS26A|RRBP1|SRI|SNX30|ATP2C1|SNX3|RAB21|SNX2|VPS53|MAPK1|SNX7|SLC38A2|RANBP2|SLC12A2|DYNC1H1|OSBPL8|SLC16A1|SLC12A5|SEC24A|CHKA|GOT1|SLC33A1|SLC16A10|I…
51234	3.1881e-09	5.1701e-07	70	2609	195	14294	establishment of localization	ARF4|SLC35B1|ATP2A2|SNX10|PARK7|FNBP1L|ERO1L|SEC61A2|COL4A3BP|OSBP|BCAP29|TMED1|SEC61B|SLC39A7|SLC12A6|TMED5|PDIA3|COG6|SLC2A10|TSC2|SDHD|ARFGAP3|DNM1|DNM3|ARL4D|SLC9A6|DNAJC6|GORASP1|SCG5|MPPE1|VPS28|ARF5|RTN3|RAB5B|TSG101|STX16|GOSR2|DERL1|ARL1|VPS26A|RRBP1|SRI|SNX30|ATP2C1|SNX3|RAB21|SNX2|VPS53|MAPK1|SNX7|SLC38A2|RANBP2|SLC12A2|DYNC1H1|OSBPL8|SLC16A1|SLC12A5|SEC24A|CHKA|GOT1|SLC33A1|SLC16A10|I…
8104	7.982e-09	1.1948e-06	36	920	195	14294	protein localization	ARF4|RAB5B|TSG101|GPAA1|STX16|GOSR2|DERL1|SNX10|RRBP1|SNX30|SNX3|SEC61A2|RAB21|SNX2|VPS53|BCAP29|MAPK1|SEC61B|SNX7|RANBP2|PDIA3|SEC24A|COG6|GOT1|TSC2|ARFGAP3|ARL4D|GORASP1|VPS41|PPT1|SCG5|CTNNB1|SEC24D|RAB5A|VPS28|ARF5
33036	1.0461e-08	1.4541e-06	40	1110	195	14294	macromolecule localization	ARF4|RAB5B|TSG101|GPAA1|STX16|GOSR2|DERL1|SNX10|RRBP1|SNX30|SNX3|SEC61A2|RAB21|COL4A3BP|SNX2|VPS53|OSBP|BCAP29|MAPK1|SEC61B|SNX7|RANBP2|PDIA3|OSBPL8|SEC24A|COG6|CHKA|GOT1|TSC2|ARFGAP3|ARL4D|GORASP1|VPS41|PPT1|SCG5|CTNNB1|SEC24D|RAB5A|VPS28|ARF5
43161	5.5007e-08	6.6902e-06	13	139	195	14294	proteasomal ubiquitin-dependent protein catabolic process	EDEM3|RPN2|HSPA5|EDEM1|DERL1|RNF5|USP19|RBX1|TBL1XR1|PCBP2|PSME2|STUB1|SEC61B
10498	5.5007e-08	6.6902e-06	13	139	195	14294	proteasomal protein catabolic process	EDEM3|RPN2|HSPA5|EDEM1|DERL1|RNF5|USP19|RBX1|TBL1XR1|PCBP2|PSME2|STUB1|SEC61B
51179	1.567e-07	1.7938e-05	72	2982	195	14294	localization	ARF4|GPAA1|SLC35B1|ATP2A2|SNX10|PARK7|HMGB1|FNBP1L|ERO1L|SEC61A2|COL4A3BP|OSBP|BCAP29|TMED1|SEC61B|SLC39A7|SLC12A6|TMED5|PDIA3|COG6|SLC2A10|TSC2|SDHD|ARFGAP3|DNM1|DNM3|ARL4D|SLC9A6|DNAJC6|GORASP1|SCG5|MPPE1|VPS28|ARF5|RTN3|RAB5B|TSG101|STX16|GOSR2|DERL1|ARL1|VPS26A|RRBP1|SRI|SNX30|ATP2C1|SNX3|RAB21|SNX2|VPS53|MAPK1|SNX7|SLC38A2|RANBP2|SLC12A2|DYNC1H1|OSBPL8|SLC16A1|SLC12A5|SEC24A|CHKA|GOT1|SLC33A…
9607	1.9778e-07	2.1382e-05	22	447	195	14294	response to biotic stimulus	EDEM3|HSP90AB1|HSPA5|EDEM1|HSPA4L|DERL1|RNF5|HERPUD1|ERO1L|PRDX3|PRDX2|CREB3|DNAJB1|IL6|VAPB|DDIT3|PCBP2|DNAJC4|MAPK1|STUB1|PIM2|TLR4
44260	2.439e-07	2.4158e-05	80	3506	195	14294	cellular macromolecule metabolic process	FKBP10|HSP90AB1|GPAA1|SUV39H1|PIGP|PIK3CB|HMGB1|ZDHHC1|ERO1L|UBL5|SYNCRIP|COL4A3BP|EEF2K|NEK2|SEC61B|PIM2|WHSC1L1|TRIM23|EIF2A|CCT2|USP8|EIF5B|ALG9|ALG5|GTF3A|OXSR1|SIRT1|RBX1|GAK|CREB3|RRAGC|TBL1XR1|DAD1|DDIT3|TCP1|DNAJC4|PSME2|MPPE1|TLR4|DCP2|PRKAA1|TSG101|PRKAA2|RPN2|HDAC1|HSPA4L|DERL1|STK39|RRBP1|RNF5|USP19|PRDX2|VCPIP1|DNAJB1|PCBP1|PCBP2|EP400|DNAJB9|MAPK1|CSK|EDEM3|RANBP2|EIF2B4|USP25|UBE2I…
6511	2.4945e-07	2.4158e-05	17	277	195	14294	ubiquitin-dependent protein catabolic process	EDEM3|USP8|USP25|TSG101|UBE2I|RPN2|HSPA5|EDEM1|DERL1|RNF5|USP19|RBX1|TBL1XR1|PCBP2|PSME2|STUB1|SEC61B
34620	2.7311e-07	2.4158e-05	6	21	195	14294	cellular response to unfolded protein	HSPA5|VAPB|DDIT3|DERL1|HERPUD1|ERO1L
30968	2.7311e-07	2.4158e-05	6	21	195	14294	endoplasmic reticulum unfolded protein response	HSPA5|VAPB|DDIT3|DERL1|HERPUD1|ERO1L
34976	3.1095e-07	2.5022e-05	7	34	195	14294	response to endoplasmic reticulum stress	COL4A3BP|HSPA5|VAPB|DDIT3|DERL1|HERPUD1|ERO1L
43632	3.2146e-07	2.5022e-05	17	282	195	14294	modification-dependent macromolecule catabolic process	EDEM3|USP8|USP25|TSG101|UBE2I|RPN2|HSPA5|EDEM1|DERL1|RNF5|USP19|RBX1|TBL1XR1|PCBP2|PSME2|STUB1|SEC61B
19941	3.2146e-07	2.5022e-05	17	282	195	14294	modification-dependent protein catabolic process	EDEM3|USP8|USP25|TSG101|UBE2I|RPN2|HSPA5|EDEM1|DERL1|RNF5|USP19|RBX1|TBL1XR1|PCBP2|PSME2|STUB1|SEC61B
44237	3.9578e-07	2.9623e-05	102	4988	195	14294	cellular metabolic process	PARK7|ZDHHC1|ERO1L|COL4A3BP|NEK2|PIM2|WHSC1L1|TRIM23|EIF2A|USP8|ALG9|ALG5|GTF3A|SDHD|RBX1|RRAGC|TBL1XR1|DDIT3|PSME2|HPRT1|CYP2E1|MPPE1|TSG101|RPN2|HSPA4L|STK39|ARL1|PRDX3|PRDX2|VCPIP1|LDHA|PCBP1|PRDX1|PCBP2|EP400|EDEM3|EIF2B4|UBE2I|CHKA|GOT1|HSPA5|EDEM1|SMARCA5|ASNS|EEF2|DNAJC18|LSM8|COPS5|PPT1|CYCS|RAB5A|FKBP10|HSP90AB1|GPAA1|SUV39H1|PIGP|ATP2A2|PIK3CB|HMGB1|PIK3C2A|UBL5|SMPD2|SYNCRIP|MAP1LC3B|M…
43170	5.2608e-07	3.7917e-05	87	4015	195	14294	macromolecule metabolic process	FKBP10|HSP90AB1|GPAA1|SUV39H1|PIGP|PIK3CB|HMGB1|ZDHHC1|ERO1L|UBL5|SYNCRIP|COL4A3BP|EEF2K|CAPNS1|FBXO3|NEK2|SEC61B|PIM2|GUSB|WHSC1L1|TRIM23|EIF2A|CCT2|USP8|EIF5B|ALG9|ALG5|GTF3A|OXSR1|SIRT1|RBX1|GAK|CREB3|RRAGC|TBL1XR1|DAD1|DDIT3|TCP1|DNAJC4|SCG5|PSME2|MPPE1|TLR4|DCP2|PRKAA1|TSG101|PRKAA2|RPN2|HDAC1|HSPA4L|DERL1|STK39|RRBP1|RNF5|USP19|DPP3|PRDX2|VCPIP1|DNAJB1|PCBP1|PCBP2|EP400|DNAJB9|MAPK1|CSK|EDE…
30163	9.2069e-07	6.3988e-05	18	339	195	14294	protein catabolic process	EDEM3|USP8|USP25|TSG101|UBE2I|RPN2|HSPA5|EDEM1|DERL1|RNF5|USP19|RBX1|TBL1XR1|PCBP2|PPT1|PSME2|STUB1|SEC61B
44238	1.0401e-06	6.9794e-05	105	5286	195	14294	primary metabolic process	ZDHHC1|ERO1L|COL4A3BP|CAPNS1|OSBP|FBXO3|NEK2|PIM2|WHSC1L1|TRIM23|EIF2A|USP8|ALG9|ALG5|GTF3A|RBX1|RRAGC|TBL1XR1|DDIT3|SCG5|PSME2|HPRT1|CYP2E1|MPPE1|TSG101|RPN2|INSIG2|HSPA4L|STK39|ARL1|DPP3|PRDX2|VCPIP1|LDHA|PCBP1|PCBP2|EP400|EDEM3|OSBPL8|EIF2B4|UBE2I|CHKA|GOT1|HSPA5|EDEM1|SMARCA5|ASNS|EEF2|DNAJC18|LSM8|COPS5|PPT1|CYCS|FKBP10|HSP90AB1|GPAA1|SUV39H1|PIGP|ATP2A2|PIK3CB|HMGB1|PIK3C2A|UBL5|SMPD2|SYNCR…
51603	1.259e-06	8.1667e-05	17	311	195	14294	proteolysis involved in cellular protein catabolic process	EDEM3|USP8|USP25|TSG101|UBE2I|RPN2|HSPA5|EDEM1|DERL1|RNF5|USP19|RBX1|TBL1XR1|PCBP2|PSME2|STUB1|SEC61B
44257	1.4363e-06	9.0165e-05	17	314	195	14294	cellular protein catabolic process	EDEM3|USP8|USP25|TSG101|UBE2I|RPN2|HSPA5|EDEM1|DERL1|RNF5|USP19|RBX1|TBL1XR1|PCBP2|PSME2|STUB1|SEC61B
8152	1.4851e-06	9.0314e-05	114	5957	195	14294	metabolic process	PARK7|ZDHHC1|ERO1L|COL4A3BP|CAPNS1|OSBP|FBXO3|NEK2|PIM2|WHSC1L1|TRIM23|EIF2A|USP8|ALG9|ALG5|GTF3A|SDHD|RBX1|RRAGC|TBL1XR1|DDIT3|SCG5|PSME2|HPRT1|CYP2E1|MPPE1|TSG101|RPN2|INSIG2|HSPA4L|STK39|ARL1|DPP3|PRDX3|PRDX2|VCPIP1|LDHA|PCBP1|PRDX1|PCBP2|EP400|RDH14|EDEM3|OSBPL8|EIF2B4|UBE2I|CHKA|GOT1|HSPA5|EDEM1|SMARCA5|ASNS|EEF2|DNAJC18|LSM8|COPS5|PPT1|CYCS|RAB5A|FKBP10|HSP90AB1|GPAA1|SUV39H1|PIGP|ATP2A2|PI…
16192	1.6324e-06	9.6263e-05	24	589	195	14294	vesicle-mediated transport	ARF4|RTN3|SEC24A|GOT1|STX16|GOSR2|ARL1|TSC2|VPS26A|FNBP1L|ARFGAP3|DNM1|SNX3|DNM3|SNX2|DNAJC6|VPS41|PPT1|BCAP29|CTNNB1|MPPE1|SEC24D|RAB5A|ARF5
44248	2.2773e-06	0.00012812	28	776	195	14294	cellular catabolic process	TSG101|RPN2|DERL1|RNF5|USP19|PRDX3|PRDX2|MAP1LC3B|MAP1LC3A|PRDX1|PCBP2|SEC61B|HIBCH|EDEM3|USP8|USP25|UBE2I|GOT1|HSPA5|EDEM1|SDHD|RBX1|TBL1XR1|PPT1|PSME2|CYCS|STUB1|DCP2
70887	2.3043e-06	0.00012812	19	399	195	14294	cellular response to chemical stimulus	PRKAA2|GOT1|HSPA5|IRS1|DERL1|ASNS|HMGB1|RNF5|HERPUD1|ERO1L|PRDX3|PRDX2|CCNA1|IL6|VAPB|DDIT3|PRDX1|CTNNB1|STUB1
44265	2.5985e-06	0.00014046	20	441	195	14294	cellular macromolecule catabolic process	EDEM3|USP8|USP25|TSG101|UBE2I|RPN2|HSPA5|EDEM1|DERL1|RNF5|USP19|RBX1|TBL1XR1|PCBP2|PPT1|PSME2|CYCS|STUB1|SEC61B|DCP2
6457	3.6943e-06	0.0001943	12	170	195	14294	protein folding	RANBP2|FKBP10|UBL5|CCT2|DNAJB1|HSP90AB1|HSPA4L|TCP1|DNAJC4|DNAJB9|ERO1L|DNAJC18
71310	5.1121e-06	0.00026179	14	239	195	14294	cellular response to organic substance	PRKAA2|GOT1|HSPA5|IRS1|DERL1|ASNS|RNF5|HERPUD1|ERO1L|CCNA1|VAPB|DDIT3|CTNNB1|STUB1
9057	5.2727e-06	0.00026309	21	503	195	14294	macromolecule catabolic process	EDEM3|USP8|USP25|TSG101|UBE2I|RPN2|HSPA5|EDEM1|DERL1|RNF5|USP19|RBX1|TBL1XR1|PCBP2|PPT1|PSME2|CYCS|STUB1|SEC61B|GUSB|DCP2
9056	5.8158e-06	0.00028294	32	1006	195	14294	catabolic process	TSG101|RPN2|DERL1|RNF5|USP19|PRDX3|PRDX2|LDHA|MAP1LC3B|MAP1LC3A|PRDX1|PCBP2|DLAT|SEC61B|GUSB|HIBCH|EDEM3|USP8|USP25|UBE2I|GOT1|HSPA5|EDEM1|SDHD|RBX1|TBL1XR1|PPT1|PSME2|CYCS|STUB1|GPD1L|DCP2
6464	6.4544e-06	0.00030635	42	1525	195	14294	protein modification process	PRKAA1|TSG101|PRKAA2|RPN2|GPAA1|HDAC1|PIGP|STK39|PIK3CB|ZDHHC1|RNF5|ERO1L|PRDX2|VCPIP1|COL4A3BP|EEF2K|EP400|MAPK1|NEK2|CSK|PIM2|WHSC1L1|TRIM23|EIF2A|USP8|USP25|ALG9|UBE2I|ALG5|OXSR1|SIRT1|RBX1|GAK|SNRK|COPS5|DAD1|PPT1|STUB1|MPPE1|P4HB|TLR4|IL17A
10033	6.8112e-06	0.00031558	29	869	195	14294	response to organic substance	HSP90AB1|PRKAA2|IRS1|HSPA4L|DERL1|RNF5|HERPUD1|ERO1L|PRDX3|PRDX2|DNAJB1|MAPK1|MCL1|EDEM3|EIF2B4|GOT1|HSPA5|EDEM1|ASNS|CCNA1|CREB3|IL6|VAPB|DDIT3|DNAJC4|CTNNB1|STUB1|CYP2E1|TLR4
42592	1.8748e-05	0.00084844	26	773	195	14294	homeostatic process	IRS1|DERL1|ATP2A2|PARK7|PIK3CB|SRI|ATP2C1|HERPUD1|PRDX3|PRDX2|COL4A3BP|BCL2L11|PRDX1|MCL1|PDIA3|SLC12A2|EIF2B4|SLC12A5|GOT1|IL6|SLC9A6|DDIT3|PPT1|CTNNB1|P4HB|TLR4
43412	2.2874e-05	0.0010117	42	1606	195	14294	macromolecule modification	PRKAA1|TSG101|PRKAA2|RPN2|GPAA1|HDAC1|PIGP|STK39|PIK3CB|ZDHHC1|RNF5|ERO1L|PRDX2|VCPIP1|COL4A3BP|EEF2K|EP400|MAPK1|NEK2|CSK|PIM2|WHSC1L1|TRIM23|EIF2A|USP8|USP25|ALG9|UBE2I|ALG5|OXSR1|SIRT1|RBX1|GAK|SNRK|COPS5|DAD1|PPT1|STUB1|MPPE1|P4HB|TLR4|IL17A
30433	2.8388e-05	0.0012276	5	27	195	14294	ER-associated protein catabolic process	HSPA5|EDEM1|DERL1|SEC61B|RNF5
42221	3.184e-05	0.001347	39	1464	195	14294	response to chemical stimulus	PRKAA1|HSP90AB1|PRKAA2|IRS1|HSPA4L|DERL1|PARK7|PIK3CB|HMGB1|RNF5|HERPUD1|ERO1L|PRDX3|PRDX2|DNAJB1|PRDX1|MAPK1|MCL1|EDEM3|EIF2B4|GOT1|HSPA5|EDEM1|ENTPD6|TSC2|ASNS|OXSR1|CCNA1|CREB3|IL6|DAD1|VAPB|DDIT3|DNAJC4|CTNNB1|HYOU1|STUB1|CYP2E1|TLR4
6950	5.0161e-05	0.0020769	44	1773	195	14294	response to stress	ARF4|RTN3|PRKAA1|HSP90AB1|PRKAA2|INSIG2|HSPA4L|DERL1|STK39|PARK7|PIK3CB|HMGB1|RNF5|HERPUD1|ERO1L|PRDX3|PRDX2|DNAJB1|COL4A3BP|MAP1LC3A|PRDX1|PCBP2|MAPK1|EIF2A|EDEM3|SLC12A2|EIF2B4|HSPA5|EDEM1|TUBB|TSC2|ASNS|OXSR1|SIRT1|RBX1|CREB3|IL6|VAPB|DDIT3|DNAJC4|HYOU1|STUB1|TLR4|IL17A
51716	7.1724e-05	0.0029078	29	987	195	14294	cellular response to stimulus	PRKAA2|IRS1|INSIG2|DERL1|HMGB1|RNF5|HERPUD1|ERO1L|PRDX3|PRDX2|LDHA|COL4A3BP|MAP1LC3A|PRDX1|MAPK1|EIF2A|EIF2B4|GOT1|HSPA5|ASNS|SIRT1|RBX1|CCNA1|IL6|VAPB|DDIT3|CTNNB1|STUB1|TLR4
183	8.4046e-05	0.0033378	3	7	195	14294	chromatin silencing at rDNA	SUV39H1|SMARCA5|SIRT1
33554	0.00011198	0.0043582	21	619	195	14294	cellular response to stress	EIF2B4|HSPA5|INSIG2|DERL1|ASNS|HMGB1|SIRT1|RNF5|HERPUD1|ERO1L|RBX1|PRDX3|PRDX2|COL4A3BP|MAP1LC3A|VAPB|DDIT3|PRDX1|MAPK1|STUB1|EIF2A
6508	0.00015707	0.0059932	23	730	195	14294	proteolysis	EDEM3|USP8|MBTPS1|USP25|TSG101|UBE2I|RPN2|HSPA5|EDEM1|DERL1|RNF5|USP19|RBX1|DPP3|SPCS1|CAPNS1|TBL1XR1|PCBP2|FBXO3|PSME2|STUB1|SEC61B|MBTPS2
44419	0.00016071	0.0060142	14	327	195	14294	interspecies interaction between organisms	RTN3|TSG101|UBE2I|HDAC1|SUV39H1|DERL1|SIRT1|SYNCRIP|CREB3|RRAGA|VAPB|MAPK1|TLR4|TRIM23
71218	0.00018517	0.0067987	2	2	195	14294	cellular response to misfolded protein	STUB1|RNF5
45767	0.0002004	0.0072219	5	40	195	14294	regulation of anti-apoptosis	IL6|PRKAA1|CTNNB1|SIRT1|RTN4
23034	0.00021586	0.0076375	31	1158	195	14294	intracellular signaling pathway	ARF4|RAB5B|PRKAA1|IRS1|INSIG2|DERL1|ARL1|ATP2A2|PIK3CB|PIK3C2A|HERPUD1|ERO1L|RAB21|PRDX2|SMPD2|MAPK1|CSK|TRIM23|EIF2A|HSPA5|TSC2|OXSR1|ARL4D|RRAGC|VAPB|DDIT3|CTNNB1|TLR4|RAB5A|ARF5|ARL8B
19725	0.00022289	0.0077454	17	466	195	14294	cellular homeostasis	PDIA3|SLC12A2|EIF2B4|SLC12A5|ATP2A2|PARK7|PIK3CB|SRI|ATP2C1|HERPUD1|PRDX3|PRDX2|DDIT3|PRDX1|PPT1|P4HB|MCL1
45454	0.00027474	0.0093796	6	66	195	14294	cell redox homeostasis	PRDX3|PDIA3|PRDX2|DDIT3|PRDX1|P4HB
34613	0.0002966	0.0098447	16	433	195	14294	cellular protein localization	RANBP2|PDIA3|SEC24A|GPAA1|STX16|DERL1|TSC2|ARFGAP3|SNX2|VPS41|SCG5|BCAP29|CTNNB1|MAPK1|SEC61B|SEC24D
46907	0.00029848	0.0098447	21	665	195	14294	intracellular transport	RANBP2|PDIA3|SEC24A|STX16|GOSR2|DERL1|ARL1|TSC2|ATP2A2|VPS26A|ARFGAP3|ATP2C1|SNX2|DNAJC6|VPS41|SCG5|BCAP29|MAPK1|MPPE1|SEC61B|SEC24D
10941	0.00031462	0.010051	25	867	195	14294	regulation of cell death	HDAC1|HMGB1|RTN4|HERPUD1|PRDX3|PRDX2|SMPD2|BCL2L11|PRDX1|MAPK1|PIM2|MCL1|PDIA3|HSPA5|TUBB|ASNS|SIRT1|RRAGA|IL6|DAD1|DDIT3|PPT1|CTNNB1|CYCS|TLR4
46489	0.00031648	0.010051	5	44	195	14294	phosphoinositide biosynthetic process	ALG9|GPAA1|PIGP|MPPE1|PIK3C2A
70727	0.00032024	0.010051	16	436	195	14294	cellular macromolecule localization	RANBP2|PDIA3|SEC24A|GPAA1|STX16|DERL1|TSC2|ARFGAP3|SNX2|VPS41|SCG5|BCAP29|CTNNB1|MAPK1|SEC61B|SEC24D
46474	0.000379	0.011707	6	70	195	14294	glycerophospholipid biosynthetic process	ALG9|CHKA|GPAA1|PIGP|MPPE1|PIK3C2A
42743	0.00039685	0.012067	4	26	195	14294	hydrogen peroxide metabolic process	PRDX3|PRDX2|PRDX1|PARK7
65008	0.00043414	0.012998	37	1541	195	14294	regulation of biological quality	GPAA1|IRS1|HDAC1|DERL1|ATP2A2|PARK7|PIK3CB|SRI|ATP2C1|RTN4|HERPUD1|PRDX3|PRDX2|COL4A3BP|BCL2L11|PRDX1|WHSC1L1|MCL1|TSPYL2|PDIA3|SLC12A2|EIF2B4|SLC12A5|GOT1|TSC2|IL6|RRAGC|SLC9A6|ARPC3|DDIT3|PPT1|SCG5|CTNNB1|P4HB|TLR4|RAB5A|DBN1
48193	0.00045231	0.013336	8	132	195	14294	Golgi vesicle transport	SEC24A|STX16|DNAJC6|GOSR2|VPS41|ARL1|MPPE1|SEC24D
6886	0.00047808	0.013886	14	364	195	14294	intracellular protein transport	RANBP2|PDIA3|SEC24A|STX16|DERL1|TSC2|ARFGAP3|SNX2|VPS41|SCG5|BCAP29|MAPK1|SEC61B|SEC24D
6515	0.00055049	0.015754	2	3	195	14294	misfolded or incompletely synthesized protein catabolic process	STUB1|RNF5
42981	0.00058345	0.016455	24	852	195	14294	regulation of apoptosis	PDIA3|HSPA5|HDAC1|TUBB|ASNS|HMGB1|SIRT1|RTN4|HERPUD1|PRDX3|PRDX2|SMPD2|IL6|BCL2L11|DAD1|DDIT3|PRDX1|PPT1|CTNNB1|CYCS|MAPK1|PIM2|TLR4|MCL1
43067	0.0006657	0.018507	24	860	195	14294	regulation of programmed cell death	PDIA3|HSPA5|HDAC1|TUBB|ASNS|HMGB1|SIRT1|RTN4|HERPUD1|PRDX3|PRDX2|SMPD2|IL6|BCL2L11|DAD1|DDIT3|PRDX1|PPT1|CTNNB1|CYCS|MAPK1|PIM2|TLR4|MCL1
30384	0.00067854	0.018598	6	78	195	14294	phosphoinositide metabolic process	ALG9|GPAA1|PIGP|MPPE1|PIK3CB|PIK3C2A
51641	0.00079855	0.021583	26	977	195	14294	cellular localization	GPAA1|STX16|GOSR2|DERL1|ARL1|ATP2A2|VPS26A|SRI|ATP2C1|SNX2|BCAP29|MAPK1|SEC61B|RANBP2|PDIA3|SEC24A|TSC2|ARFGAP3|ARL4D|IL6|DNAJC6|VPS41|SCG5|CTNNB1|MPPE1|SEC24D
6497	0.00082554	0.021799	5	54	195	14294	protein amino acid lipidation	ALG9|GPAA1|PIGP|MPPE1|ZDHHC1
42157	0.00082894	0.021799	6	81	195	14294	lipoprotein metabolic process	ALG9|GPAA1|PIGP|PPT1|MPPE1|ZDHHC1
45017	0.00094267	0.024459	6	83	195	14294	glycerolipid biosynthetic process	ALG9|CHKA|GPAA1|PIGP|MPPE1|PIK3C2A
43687	0.00097064	0.024652	31	1265	195	14294	post-translational protein modification	PRKAA1|TSG101|PRKAA2|GPAA1|HDAC1|STK39|PIK3CB|RNF5|ERO1L|PRDX2|VCPIP1|COL4A3BP|EEF2K|EP400|MAPK1|NEK2|CSK|PIM2|WHSC1L1|TRIM23|EIF2A|USP8|UBE2I|OXSR1|SIRT1|RBX1|GAK|SNRK|COPS5|STUB1|TLR4
44403	0.00097545	0.024652	5	56	195	14294	symbiosis, encompassing mutualism through parasitism	RRAGA|HDAC1|VAPB|DERL1|TLR4
45768	0.0010083	0.025155	4	33	195	14294	positive regulation of anti-apoptosis	IL6|PRKAA1|CTNNB1|SIRT1
42149	0.0010911	0.026877	2	4	195	14294	cellular response to glucose starvation	HSPA5|ASNS
6506	0.0011306	0.027502	4	34	195	14294	GPI anchor biosynthetic process	ALG9|GPAA1|PIGP|MPPE1
42158	0.001237	0.02972	5	59	195	14294	lipoprotein biosynthetic process	ALG9|GPAA1|PIGP|MPPE1|ZDHHC1
6505	0.001263	0.029974	4	35	195	14294	GPI anchor metabolic process	ALG9|GPAA1|PIGP|MPPE1
6650	0.0013459	0.031179	7	121	195	14294	glycerophospholipid metabolic process	ALG9|CHKA|GPAA1|PIGP|MPPE1|PIK3CB|PIK3C2A
31396	0.0013459	0.031179	7	121	195	14294	regulation of protein ubiquitination	UBL5|RPN2|RNF139|HSPA5|PSME2|STUB1|VPS28
22415	0.0014381	0.032924	5	61	195	14294	viral reproductive process	CREB3|RRAGA|TSG101|VAPB|DERL1
16043	0.0014627	0.033024	52	2561	195	14294	cellular component organization	ECM2|GPAA1|IRS1|EHMT2|SUV39H1|HMGB1|FNBP1L|COL4A3BP|MAP1LC3A|H2AFJ|NEK2|HMG20A|PIM2|WHSC1L1|EIF2A|TSPYL2|USP8|TUBB|TSC2|SIRT1|DNM1|DNM3|CCNA1|TBL1XR1|DNAJC6|GORASP1|TCP1|HPRT1|DBN1|RAB5B|PRKAA2|HDAC1|GOSR2|ARL1|ATP2C1|SNX3|PRDX3|VCPIP1|SNX2|EP400|DYNC1H1|UBE2I|SEC24A|H3F3A|SMARCA5|NAP1L3|IL6|PPT1|CTNNB1|CYCS|SEC24D|RAB5A
42744	0.0014764	0.033024	3	17	195	14294	hydrogen peroxide catabolic process	PRDX3|PRDX2|PRDX1
51649	0.001641	0.036288	23	865	195	14294	establishment of localization in cell	RANBP2|PDIA3|SEC24A|STX16|GOSR2|DERL1|ARL1|TSC2|ATP2A2|VPS26A|ARFGAP3|ATP2C1|ARL4D|IL6|SNX2|DNAJC6|VPS41|SCG5|BCAP29|MAPK1|MPPE1|SEC61B|SEC24D
30970	0.0018021	0.038966	2	5	195	14294	retrograde protein transport, ER to cytosol	DERL1|SEC61B
51788	0.0018021	0.038966	2	5	195	14294	response to misfolded protein	STUB1|RNF5
51701	0.0019016	0.039988	4	39	195	14294	interaction with host	RRAGA|VAPB|DERL1|TLR4
6888	0.0019016	0.039988	4	39	195	14294	ER to Golgi vesicle-mediated transport	SEC24A|GOSR2|MPPE1|SEC24D
42542	0.001911	0.039988	5	65	195	14294	response to hydrogen peroxide	PRDX3|PRDX2|DDIT3|PRDX1|PARK7
6996	0.001972	0.040825	32	1380	195	14294	organelle organization	RAB5B|HDAC1|EHMT2|SUV39H1|ARL1|ATP2C1|PRDX3|VCPIP1|COL4A3BP|MAP1LC3A|H2AFJ|EP400|NEK2|HMG20A|PIM2|WHSC1L1|EIF2A|TSPYL2|DYNC1H1|USP8|UBE2I|TUBB|H3F3A|SMARCA5|NAP1L3|SIRT1|CCNA1|TBL1XR1|GORASP1|PPT1|CTNNB1|DBN1
46486	0.0020003	0.040975	8	166	195	14294	glycerolipid metabolic process	ALG9|CHKA|GPAA1|PIGP|MPPE1|PIK3CB|PIK3C2A|SIRT1
19637	0.0022337	0.045209	9	208	195	14294	organophosphate metabolic process	SMPD2|ALG9|CHKA|GPAA1|PIGP|MPPE1|PIK3CB|GPD1L|PIK3C2A
7264	0.0022565	0.045209	11	292	195	14294	small GTPase mediated signal transduction	RAB21|ARF4|ARL4D|RAB5B|RRAGC|ARL1|MAPK1|RAB5A|ARF5|TRIM23|ARL8B
16044	0.0022767	0.045209	13	382	195	14294	cellular membrane organization	SEC24A|GOSR2|TSC2|FNBP1L|DNM1|SNX3|DNM3|VCPIP1|SNX2|DNAJC6|PPT1|SEC24D|RAB5A
61024	0.002329	0.045416	13	383	195	14294	membrane organization	SEC24A|GOSR2|TSC2|FNBP1L|DNM1|SNX3|DNM3|VCPIP1|SNX2|DNAJC6|PPT1|SEC24D|RAB5A
16032	0.0023338	0.045416	5	68	195	14294	viral reproduction	CREB3|RRAGA|TSG101|VAPB|DERL1
